# Supplementary material for: Recent progress in multi-resonance thermally activated delayed fluorescence emitters with an efficient reverse intersystem crossing process
Source: Royal Society of Chemistry journal article supplement (doi:10.1039/d3cc05460h), 2023-12-21

## Supporting Information

### Recent progress of multi-resonance thermally activated delayed fluorescence emitters with efficient reverse intersystem crossing process

Xu-Feng Luo,<sup>a,b</sup> Xunwen Xiao\*,<sup>a</sup> and You-Xuan Zheng\*,<sup>b</sup>

<sup>a</sup>College of Material Science and Chemical Engineering, Ningbo University of Technology, 201 Fenghua Road, Ningbo 315211, P. R. China.

E-mail: [xunwenxiao@nbut.edu.cn](mailto:xunwenxiao@nbut.edu.cn)

<sup>b</sup>State Key Laboratory of Coordination Chemistry, School of Chemistry and Chemical Engineering, Nanjing University, Nanjing 210093, P. R. China

E-mail: [yxzheng@nju.edu.cn](mailto:yxzheng@nju.edu.cn)

### Supplementary chemical structure and related optoelectronic properties

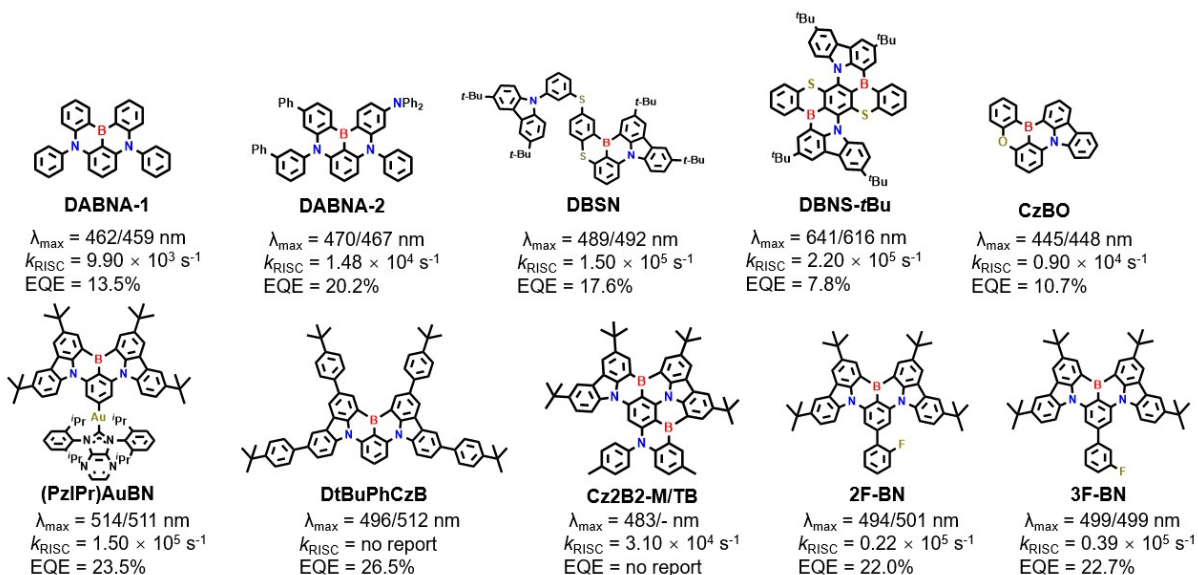

Supplement: d3cc05460h1.pdf [file d3cc05460h1.pdf]
